# Supplementary material
Source: MDPI journal article supplement (https://www.mdpi.com/2073-4395/13/10/2652)
Supplement: s1 [file s1]

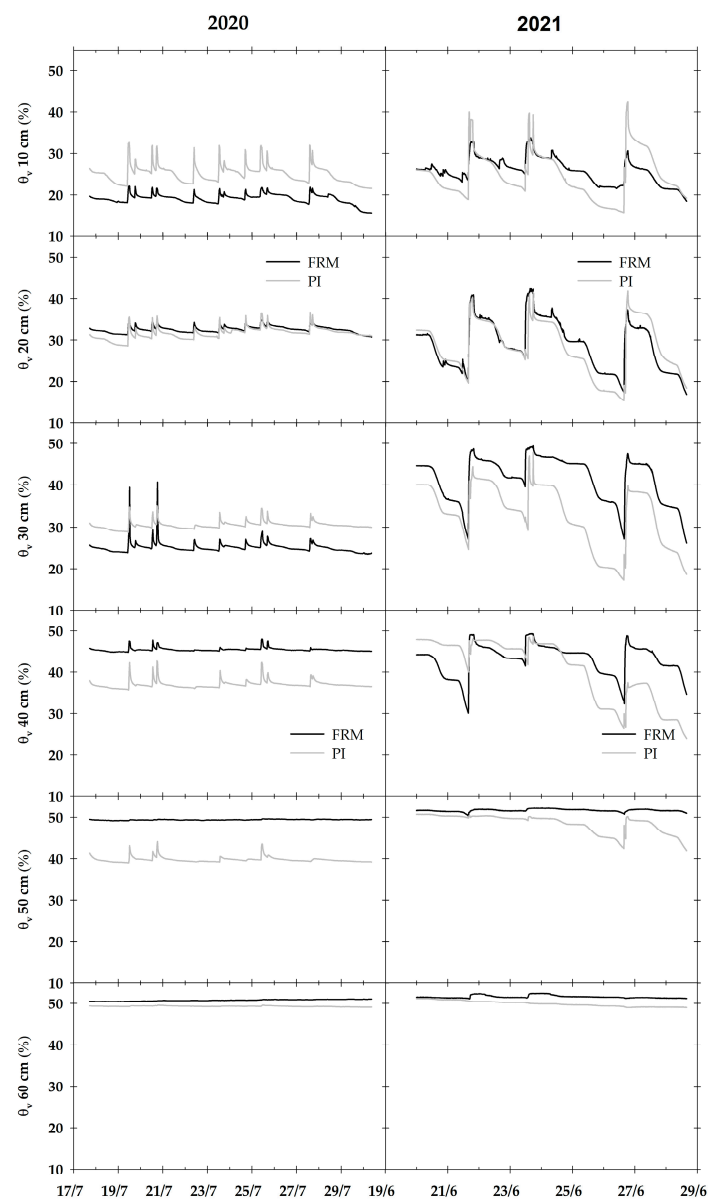

**Figure S1.** Continuous evolution of volumetric soil water content in the soil profile from 10 to 60 cm depth, for the two irrigation treatments, at an interval of 13 and 9 days during summer, for the years 2020 and 2021, respectively.

**Table S1.** Evolution of gas exchange parameters in the trial period for melon plants subjected to different irrigation regimes (FRM: farmer criteria and PI: precision irrigation): Net photosynthesis (Pn), leaf conductance (Lc) and midday stem water potential ( $\Psi_s$ ).

|                                             | Year<br>DAT | 2020               |                    |                    |                    |                    | 2021               |
|---------------------------------------------|-------------|--------------------|--------------------|--------------------|--------------------|--------------------|--------------------|
|                                             |             | 36                 | 43                 | 55                 | 60                 | 70                 | 71                 |
| Pn ( $\mu\text{mol m}^{-2} \text{s}^{-1}$ ) | FRM         | 25.55 $\pm$ 1.25 a | 16.19 $\pm$ 2.03 a | 21.15 $\pm$ 3.80 a | 22.70 $\pm$ 2.10 a | 19.96 $\pm$ 3.14 a | 28.48 $\pm$ 0.43 a |
|                                             | PI          | 23.81 $\pm$ 1.58 a | 16.82 $\pm$ 3.51 a | 21.05 $\pm$ 2.59 a | 22.36 $\pm$ 1.17 a | 24.55 $\pm$ 0.68 a | 27.10 $\pm$ 2.39 a |
| Lc ( $\text{mmol m}^{-2} \text{s}^{-1}$ )   | FRM         | 290 $\pm$ 13 a     | 107 $\pm$ 17 a     | 276 $\pm$ 46 a     | 160 $\pm$ 7 a      | 164 $\pm$ 32 a     | 380 $\pm$ 14 a     |
|                                             | PI          | 249 $\pm$ 14 a     | 106 $\pm$ 18 a     | 194 $\pm$ 46 a     | 148 $\pm$ 6 a      | 168 $\pm$ 13 a     | 434 $\pm$ 75 a     |
| $\Psi_s$ (MPa)                              | FRM         | −0.53 $\pm$ 0.04 a | −0.60 $\pm$ 0.02 a | −0.55 $\pm$ 0.03 a | −0.37 $\pm$ 0.03 a | −0.48 $\pm$ 0.03 a | −0.44 $\pm$ 0.03 a |
|                                             | PI          | −0.58 $\pm$ 0.02 a | −0.62 $\pm$ 0.01 a | −0.52 $\pm$ 0.04 a | −0.44 $\pm$ 0.03 a | −0.48 $\pm$ 0.03 a | −0.45 $\pm$ 0.02 a |

DAT: Days after transplanting. 0 DAT correspond to 30<sup>th</sup> April in 2020 or 07<sup>th</sup> April in 2021. Means  $\pm$  standard error,  $n = 4$ .

Different letters for the same parameter and day after transplant (DAT) indicate significant differences according to Duncan's test (p < 0.05).

**Table S2.** Multispectral indexes and crop ground cover for melon plant subjected to different irrigation regimes (FRM: farmer criteria and PI: precision irrigation).

| Year     | TRT | NVDI           | Ground cover (%) |
|----------|-----|----------------|------------------|
| 2020     | FRM | 0.823 ±0.003 a | 95.03 ±0.75 a    |
|          | PI  | 0.816 ±0.006 a | 92.91 ±0.46 a    |
| 2021     | FRM | 0.755 ±0.003 a | 93.70 ±0.65 a    |
|          | PI  | 0.750 ±0.001 a | 94.25 ±1.33 a    |
| TRT (T)  |     | <i>ns</i>      | <i>ns</i>        |
| Year (Y) |     | ***            | <i>ns</i>        |
| T*Y      |     | <i>ns</i>      | <i>ns</i>        |

Means ± standard error,  $n = 4$ . Different letters for the same parameter and year indicate significant differences between irrigation treatments according to Duncan's test ( $p < 0.05$ ). \*\*\*:  $p < 0.001$ , \*\*:  $p < 0.01$ , \*:  $p < 0.05$  and *ns*: non-significant, for the ANOVA.

**Table S3.** Evolution of foliar NPK in melon plants subjected to different irrigation regimes (FRM: farmer criteria and PI: precision irrigation) in 2020.

| DAT | TRT | N          |   | P          |   | K          |   |
|-----|-----|------------|---|------------|---|------------|---|
|     |     | (%)        |   | (%)        |   | (%)        |   |
| 46  | FRM | 4.15 ±0.22 | a | 0.35 ±0.03 | a | 3.16 ±0.17 | a |
|     | PI  | 4.11 ±0.25 | a | 0.32 ±0.02 | a | 3.48 ±0.09 | a |
| 60  | FRM | 3.80 ±0.08 | a | 0.23 ±0.01 | a | 2.02 ±0.20 | a |
|     | PI  | 3.48 ±0.08 | b | 0.20 ±0.01 | b | 2.53 ±0.15 | a |
| 90  | FRM | 3.26 ±0.15 | a | 0.51 ±0.05 | b | 1.64 ±0.10 | a |
|     | PI  | 2.93 ±0.09 | a | 0.30 ±0.04 | a | 1.89 ±0.09 | a |

DAT: Days after transplanting. 0 DAT correspond to 30<sup>th</sup> April in 2020 or 07<sup>th</sup> April in 2021. Means ± standard error,  $n = 4$ . Different letters for the same parameter and DAT indicate significant differences according to Duncan's test<sub>7</sub> ( $p < 0.05$ ).

**Table S4.** Harvested melon macro- and micro-nutrients, ammoniacal nitrogen, and nitrate in plants subjected to different irrigation regimes (FRM: farmer criteria and PI: precision irrigation) in 2020.

| DAT | TRT | N<br>%     |   | P<br>%     |   | K<br>%     |   | Ca<br>%    |   | Mg<br>%    |   |
|-----|-----|------------|---|------------|---|------------|---|------------|---|------------|---|
| 90  | FRM | 0.78 ±0.05 | a | 0.10 ±0.02 | a | 2.17 ±0.09 | a | 0.14 ±0.01 | a | 0.14 ±0.01 | a |
|     | PI  | 0.86 ±0.07 | a | 0.10 ±0.02 | a | 2.16 ±0.12 | a | 0.14 ±0.03 | a | 0.13 ±0.01 | a |

| DAT | TRT | Fe<br>mg Kg <sup>-1</sup> |   | Mn<br>mg Kg <sup>-1</sup> |   | Cu<br>mg Kg <sup>-1</sup> |   | Zn<br>mg Kg <sup>-1</sup> |   | B<br>mg Kg <sup>-1</sup> |   | N-NH <sub>4</sub> <sup>+</sup><br>mg Kg <sup>-1</sup> |   | NO <sub>3</sub> <sup>-</sup><br>mg Kg <sup>-1</sup> |   |
|-----|-----|---------------------------|---|---------------------------|---|---------------------------|---|---------------------------|---|--------------------------|---|-------------------------------------------------------|---|-----------------------------------------------------|---|
| 90  | FRM | 28.5 ±1.4                 | a | 5.00 ±0.41                | a | 3.30 ±0.39                | a | 12.4 ±2.0                 | a | 12.1 ±0.6                | a | 40.23-4.01                                            | a | 426.7 ±96.1                                         | a |
|     | PI  | 26.5 ±4.6                 | a | 4.48 ±0.31                | a | 2.53 ±0.30                | a | 9.6 ±1.0                  | a | 12.7 ±0.5                | a | 37.40-3.50                                            | a | 412.0 ±55.2                                         | a |

Different letters for the same parameter and day after transplant (DAT) indicate significant differences according to Duncan's test (p < 0.05).

**Table S5.** Bulk soil analysis for melon plant subjected to different irrigation regimes (FRM: farmer criteria and PI: precision irrigation) in 2020.

| DAT | Depth | TRT  | NT<br>%    | P <sub>2</sub> O <sub>5</sub><br>mg Kg <sup>-1</sup> | K <sub>2</sub> O<br>mg Kg <sup>-1</sup> | CaO<br>mg Kg <sup>-1</sup> | MgO<br>mg Kg <sup>-1</sup> |
|-----|-------|------|------------|------------------------------------------------------|-----------------------------------------|----------------------------|----------------------------|
| 0   | 30    | None | 0.11       | 114                                                  | 594                                     | 1540                       | 308                        |
| 90  | 30    | FRM  | 0.06 ±0.01 | a 82 ±28                                             | a 406 ±161                              | a 2574 ± 47                | a 571 ±42                  |
|     |       | PI   | 0.05 ±0.01 | a 60 ± 6                                             | a 255 ± 17                              | a 2559 ±129                | a 504 ±40                  |
| 90  | 60    | FRM  | 0.04 ±0.01 | a 22 ± 0                                             | a 161 ± 25                              | a 2641 ± 27                | a 539 ±24                  |
|     |       | PI   | 0.02 ±0.01 | a 25 ± 1                                             | a 171 ± 10                              | a 2974 ±361                | a 498 ±50                  |

| DAT | TRT | pH   | CE (1:5)<br>mS/cm | MO<br>%      | C/N          | Bulk density<br>g cm <sup>-3</sup> | CEC<br>meq 100g <sup>-1</sup> |
|-----|-----|------|-------------------|--------------|--------------|------------------------------------|-------------------------------|
| 0   | 30  | None | 8.03              | 0.31         | 1.42         | 7.58                               | 1.40                          |
| 90  | 30  | FRM  | 7.56 ±0.07        | a 0.47 ±0.16 | a 0.67 ±0.16 | a 6.62 ±0.77                       | a 1.48 ±0.01                  |
|     |     | PI   | 7.65 ±0.05        | a 0.34 ±0.03 | a 0.59 ±0.08 | a 6.83 ±0.26                       | a 1.50 ±0.02                  |
| 90  | 60  | FRM  | 7.58 ±0.01        | a 0.17 ±0.01 | a 0.24 ±0.02 | a 4.12 ±0.23                       | a 1.49 ±0.01                  |
|     |     | PI   | 7.63 ±0.04        | a 0.20 ±0.02 | a 0.21 ±0.05 | a 5.31 ±0.74                       | a 1.53 ±0.01                  |

DAT: Days after transplanting. 0 DAT correspond to 30<sup>th</sup> April in 2020 or 07<sup>th</sup> April in 2021. Means ± standard error, *n* = 4. Different letters for the same parameter and DAT indicate significant differences according to Duncan's test<sub>7</sub> (*p* < 0.05).
